# Supplementary material for: Ru0.01Ti0.99Nb2O7 as an intercalation-type anode material with a large capacity and high rate performance for lithium-ion batteries
Source: Royal Society of Chemistry journal article supplement (doi:10.1039/c5ta01073j), 2015-01-01
Supplement: c5ta01073j1.pdf [file c5ta01073j1.pdf]

## Electronic Supplementary Information

### **$\text{Ru}_{0.01}\text{Ti}_{0.99}\text{Nb}_2\text{O}_7$ as an intercalation-type anode material with a large capacity and high rate performance for lithium-ion batteries**

Chunfu Lin,<sup>\*‡<sup>a</sup></sup> Shu Yu,<sup>‡<sup>b</sup></sup> Shunqing Wu,<sup>\*<sup>b</sup></sup> Shiwei Lin,<sup>\*<sup>a</sup></sup> Zi-Zhong Zhu,<sup><sup>b</sup></sup> Jianbao Li<sup><sup>a</sup></sup> and Li Lu<sup>\*<sup>c</sup></sup>

*a* Key Laboratory of Ministry of Education for Advanced Materials in Tropical Island Resources, School of Materials and Chemical Engineering, Hainan University, Haikou 570228, Hainan, PR China; E-mail: linchunfu@hainu.edu.cn (C. F. Lin); E-mail: linsw@hainu.edu.cn (S. W. Lin); Fax: +86-898-66290185; Tel: +86-898-66290185

*b* Department of Physics and Institute of Theoretical Physics and Astrophysics, Xiamen University, Xiamen 361005, PR China; E-mail: wsq@xmu.edu.cn (S. Q. Wu); Fax: +86-592-2189426; Tel: +86-592-2182248

*c* Department of Mechanical Engineering, National University of Singapore, 9 Engineering Drive 1, Singapore 117576, Singapore. E-mail: luli@nus.edu.sg; Fax: +65-67791459; Tel: +65-65162236

‡ These authors have contributed equally to this work

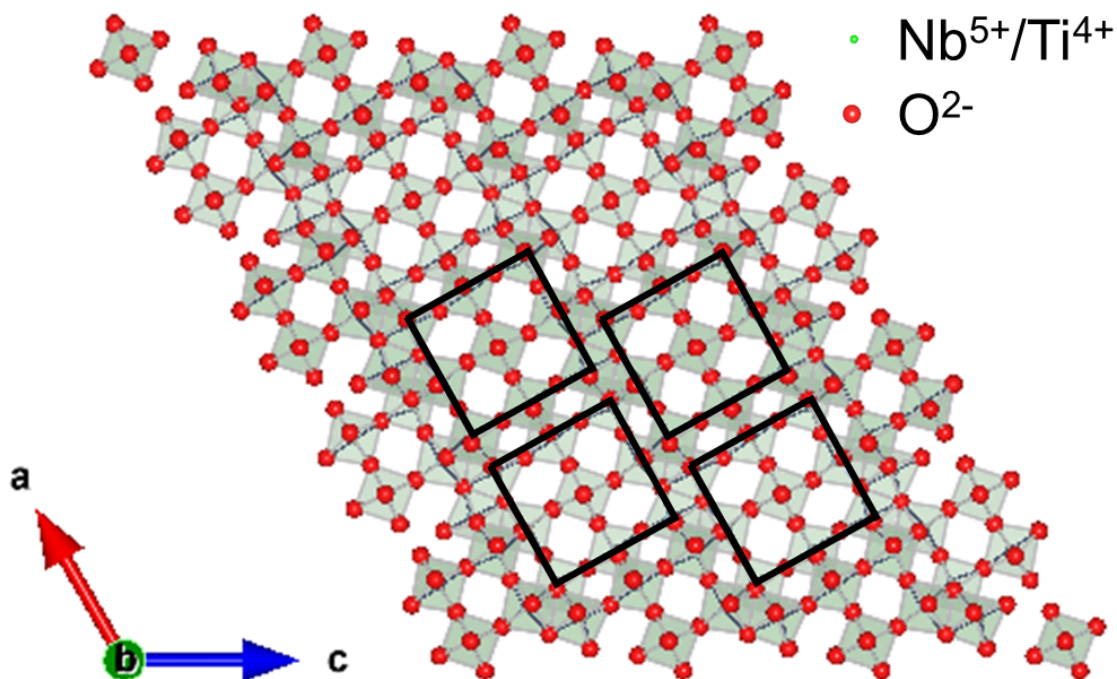

Fig. S1 Crystal structure of  $\text{TiNb}_2\text{O}_7$  showing the  $m \times n \times \infty$  ( $m = n = 3$ )  $\text{ReO}_3$ -type blocks.

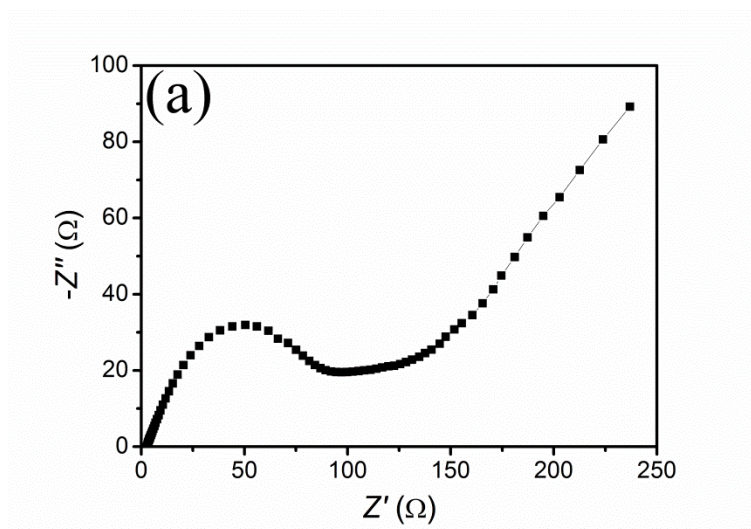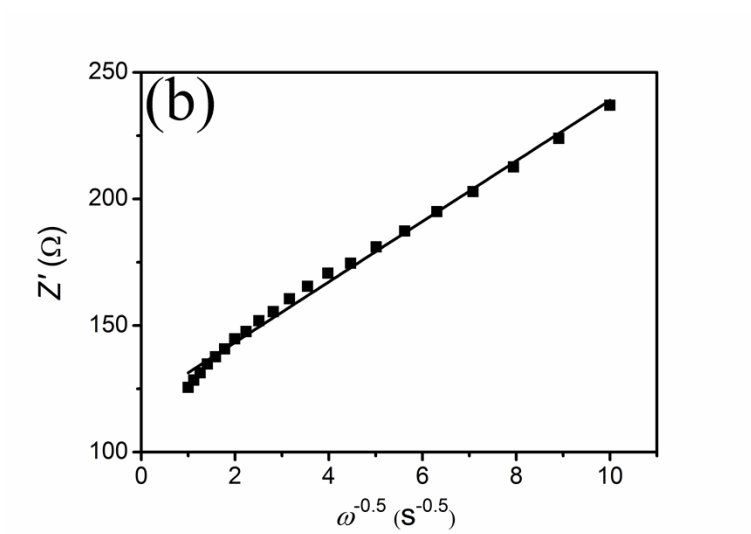

Fig. S2 (a) Nyquist plots of  $\text{Li}_4\text{Ti}_5\text{O}_{12}/\text{Li}$  cell. (b) Relationship between real impedance with low frequency for  $\text{Li}_4\text{Ti}_5\text{O}_{12}/\text{Li}$  cell. The specific surface area of  $\text{Li}_4\text{Ti}_5\text{O}_{12}$  is  $3.63 \text{ m}^2 \text{ g}^{-1}$ . The loading density of  $\text{Li}_4\text{Ti}_5\text{O}_{12}$  is  $1.45 \text{ mg cm}^{-2}$ .  $\sigma_w = 11.95 \text{ } \Omega \text{ s}^{-0.5}$ .  $D = 1.81 \times 10^{-16} \text{ cm}^2 \text{ s}^{-1}$ .

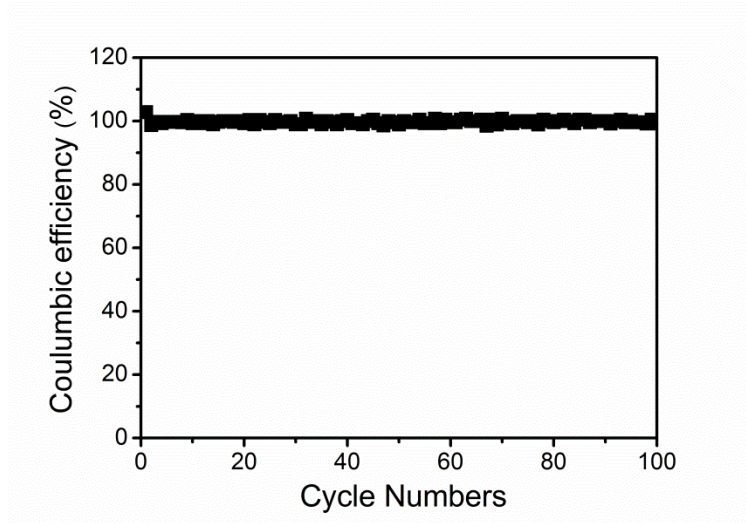

Fig. S3 Coulombic efficiency of  $\text{Ru}_{0.01}\text{Ti}_{0.99}\text{Nb}_2\text{O}_7/\text{Li}$  cell at 5 C.

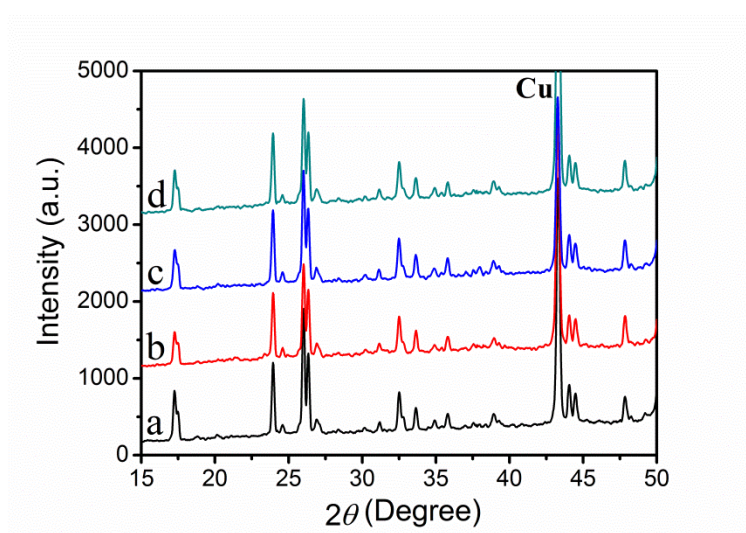

Fig. S4 *Ex-situ* XRD patterns of  $\text{TiNb}_2\text{O}_7$  electrodes after (a) as-fabricated, (b) first-discharged to 0.8 V vs.  $\text{Li}/\text{Li}^+$ , (c) first-charged to 3 V vs.  $\text{Li}/\text{Li}^+$ , and (d) charged to 3 V vs.  $\text{Li}/\text{Li}^+$  in the 10<sup>th</sup> cycle. Identical discharge–charge rates were used.

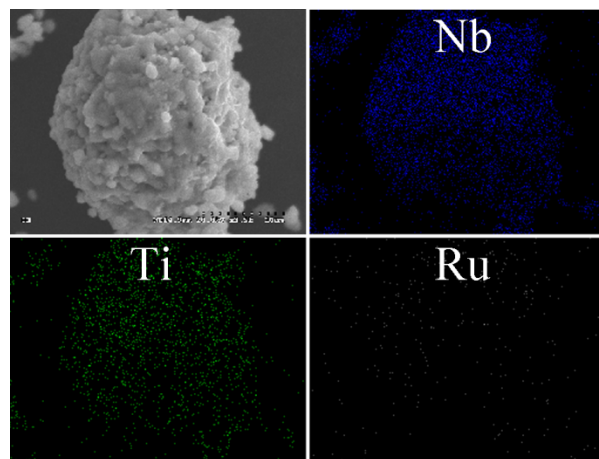

Fig. S5 SEM image and EDX mapping of  $\text{Ru}_{0.01}\text{Ti}_{0.99}\text{Nb}_2\text{O}_7$ .
